# Supplementary material
Source: PubMed Central journal article supplement (PMC7158987)
Supplement: mmc1.pdf [file mmc1.pdf]

## Supplementary webappendix

This webappendix formed part of the original submission and has been peer reviewed. We post it as supplied by the authors.

Supplement to: Dunning JW, Merson L, Rohde GGU, et al. Open source clinical science for emerging infections. *Lancet Infect Dis* 2014; **13**: 8–9.

# Open source clinical science for emerging infections

## Appendix

### ISARIC Working Group 3 (Genomics, Pathogenesis, and Pharmacology)

Ken Baillie (Chair), Peter Openshaw (Co-chair), Sylvie van der Werf (Co-chair), Tamar Akhvlediani, Abdullah Brooks, Roberto Bruzzone, Gail Carson, Xavier de Lamballerie, Paolo Denti, Jake Dunning, T Eoin West, Dean Everett, Jeremy Farrar, Zhancheng Gao, Anthony Gordon, Saye H Khoo, Fred Hayden, Jean-Michel Heraud, Jethro Herberg, Peter Horby, Evangelos J Giamarellos-Bourboulis, Paul Kellam, Tatia Kuchuloria, Leticia Lobo-Luppi, John Marshall, Helen McIlleron, Laura Merson, Piero Olliaro, Glaucia Paranhos-Baccala, Malik Peiris, Jordi Rello, Guillermo Ruiz-Palacios, Dat Tran, Tim Walsh.

### ISARIC Council Meeting Contributors

Tamuna Akhvlediani, Derek Angus, Ken Baillie, Scott Berry, Lucille Blumberg, Fernando Bozza, Stephen Brett, Abdullah Brooks, Caroline Brown, Roberto Bruzzone, Gail Carson, Jean-Daniel Chiche, Menno de Jong, Xavier de Lamballerie, Arjen Dondorp, Dean Everett, Jeremy Farrar, Zhancheng Gao, Herman Goossens, Fred Hayden, Jean-Michel Heraud, Tran Tinh, Raul Isturiz, Paul Kellam, Keith Klugman, Dan Korbel, Tatia Kuchuloria, David Laloo, Trudie Lang, Matthew Lim, Le Thi, Kajsa-Stina Magnusson, Kathryn Maitland, John Marshall, Shelly McNeil, Laura Merson, Manuel Morillas, Bernadette Murgue, Lois Nicholas, Piero Olliaro, Peter Openshaw, Malik Peiris, Garyphallia Poulakou, Robert Read, Jordi Rello, Gernot Rohde, Cathy Roth, Kathy Rowan, Guillermo Ruiz-Palacios, Calum Semple, Nikki Shindo, Yuelong Shu, Marilda Siqueira, Dat Tran, Tim Uyeki, Guy Vernet, Timothy Walsh, Steve Webb, Marcel Wolbers.

### Contributors

ISARIC Working Group 3 defined, assessed and prioritised research studies. The ISARIC Council reviewed and considered the planned studies, and provided feedback on the protocols. LM, JKB, JWD, GR, JF, ZG, GC, MGS, and PJMO wrote the protocols and supporting documents. JKB, PO, SvdW, and JF led the development of research studies. SvdW, JKB, ZG, JWD, AG, PLO, PK, SHK, RB, PH, DE, PJMO, and TA proposed studies. All authors contributed to and reviewed drafts of the protocols, supporting documents, and the manuscript.

### Acknowledgments

JKB is supported by a Wellcome Trust Clinical Fellowship (090385/Z/09/Z) through the Edinburgh Clinical Academic Track (ECAT), and through core institutional support funding from the BBSRC at the Roslin Institute. ISARIC activities, including the Coordinating Centre (GC and K-SL) are supported by grants from the Wellcome Trust (WT098091MA), Medical Research Council UK (MCUMAE02E000), The Bill and Melinda Gates Foundation (OPP1034566), INSERM,

Li Ka Shing Foundation, Fondation Merieux, and the Ministry of Health of Singapore. JD and PJMO are supported by the Wellcome Trust (Programme Grants 090382 and 25092), and acknowledge NIHR support of the comprehensive Biomedical Research Centre (cBRC) at Imperial College NHS Healthcare Trust. The funders had no role in the decision to publish or preparation of the manuscript.

**Funding organisations supporting ISARIC**

The Wellcome Trust

Medical Research Council UK

The Bill and Melinda Gates Foundation

Li Ka Shing Foundation

INSERM

Fondation Merieux

Singapore Ministry of Health
